# Supplementary material for: Antifouling Marine Coatings with a Potentially Safer and Sustainable Synthetic Polyphenolic Derivative
Source: MDPI journal article supplement (doi:10.3390/md20080507), 2022-08-05
Supplement: s1 [file s1]

# Antifouling Marine Coatings with a Potentially Safer and Sustainable Synthetic Polyphenolic Derivative

Ana R. Neves<sup>1,2</sup>, Luciana C. Gomes<sup>3,4</sup>, Sara I. Faria<sup>3,4</sup>, João Sousa<sup>2</sup>, Raquel Ruivo<sup>2</sup>, Inês Páscoa<sup>2</sup>, Madalena Pinto<sup>1,2</sup>, Emília Sousa<sup>1,2</sup>, Miguel M. Santos<sup>2,5</sup>, Elisabete R. Silva<sup>6,7,\*</sup>, Marta Correia-da-Silva<sup>1,2,\*</sup>, Filipe Mergulhão<sup>3,4</sup>

<sup>1</sup> Laboratory of Organic and Pharmaceutical Chemistry, Faculty of Pharmacy, University of Porto, Rua Jorge de Viterbo Ferreira 228, 4050-313 Porto, Portugal.

<sup>2</sup> Interdisciplinary Centre of Marine and Environmental Research (CIIMAR), University of Porto, Novo Edifício do Terminal de Cruzeiros do Porto de Leixões, Av. General Norton de Matos, s/n, 4450-208 Matosinhos, Portugal

<sup>3</sup> LEPABE—Laboratory for Process Engineering, Environment, Biotechnology and Energy, Faculty of Engineering, University of Porto, Rua Dr. Roberto Frias, 4200-465 Porto, Portugal.

<sup>4</sup> ALiCE - Associate Laboratory in Chemical Engineering, Faculty of Engineering, University of Porto, Rua Dr. Roberto Frias, 4200-465 Porto, Portugal.

<sup>5</sup> FCUP—Faculty of Sciences, University of Porto, Department of Biology, Porto, Portugal.

<sup>6</sup> BioISI—Biosystems & Integrative Sciences Institute, Faculty of Sciences, University of Lisboa, Campo Grande, 1749-016 Lisboa, Portugal.

<sup>7</sup> Departamento de Química e Bioquímica, Faculdade de Ciências, Universidade de Lisboa, Campo Grande, 1749-016 Lisboa, Portugal.

\* Correspondence: ersilva@fc.ul.pt (coatings); m\_correiadasilva@ff.up.pt (polyphenolic derivative)

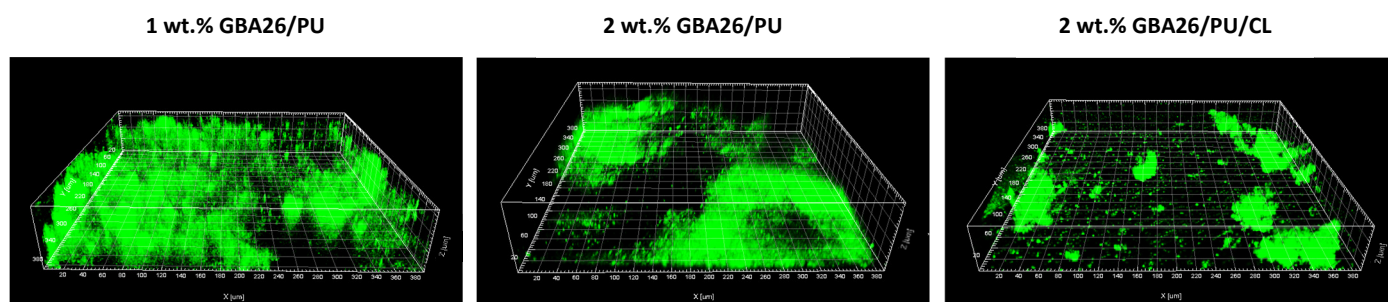

Figure S1. Isosurface rendered 3D visualizations of *Pseudoalteromonas tunicata* biofilms formed on a surface protected with 1 wt.% GBA26/PU coating, a surface treated with 2 wt.% GBA26/PU coating, and a surface treated with 2 wt.% GBA26/PU/CL coating after 49 days. These images were obtained from the same confocal stacks used to create Figure 3 using the “Surpass” function of IMARIS software. Each square of the 3D grid corresponds to  $20 \times 20 \mu\text{m}$ .
